# Supplementary material
Source: MDPI journal article supplement (https://www.mdpi.com/2071-1050/9/11/1969)
Supplement: s1 [file s1]

## Sheet: Comparative nexus analysis
Nexus, 2-regions, See Fig. 2	Indicator	Unit	Benchmark	Weight	Okinawa, current	Divergence from benchmark	Score, positioning benchmark at 6	Score combined (input to Fig. 2)	Sogn og Fjordane	Divergence from benchmark	Score	Score combined (input to Fig. 2)
Water	Freshwater withdrawal as share of total actual renewable water resources	%	40	2	10.2001	-0.744997	5.255	5.255	0.7	-0.9825	5.0175	5.007
Water	Share of monitoring sites in agriculture above limit	%	29	3	N/A				0	-1	5
Energy	Share of fossil energy in total energy supply	%	88	3	99.5	0.130682	6.13068	6.17591	65	-0.261364	5.73864	5.44318
Energy	Energy imports	%	80	2	99.5	0.24375	6.24375		0	-1	5
Food	Net import of agricultural products, food and live animals	1000 I$ per person	-0.02	2	0.09	0.22	6.22	5.94714	0.48	1	7	6.56849
Food	Change in cropland over the last 10 years	%	-7.3	2	-4.92219	-0.325728	5.67427		-8.3	0.136986	6.13699
Labour	Total economic active population in agriculture/total economic active population	%	4.5	3	5	0.111111	6.11111	5.90552	7	0.555556	6.55556	6.21948
Labour	Average earning in agricultural production versus average earning in manufacturing		1.42	1	0.41	-0.711268	5.28873		0.3	-0.788732	5.21127
Capital	Total economic active population in agriculture versus net production value of agriculture	per 1000 I$	0.096	1	0.046	-0.520833	5.47917	6.12876	0.025	-0.739583	5.26042	5.40143
Capital	Investment share in GDP	%	22.3	3	30	0.345291	6.34529		10	-0.55157	5.44843
		Input Fig. 3							Input Fig. 4
		Nexus, 2-regions	Okinawa	Sogn og Fjordane	Position of benchmark				Nexus, Today - Scenarios	Scenario I	Scenario II	Okinawa baseline
		Water	5.255	5.007	6				Water	6.4557	6.75949	6
		Energy	6.17591	5.44318	6				Energy	5.41508	4.8	6
		Food	5.94714	6.56849	6				Food	4.42864	2.76522	6
		Labour	5.90552	6.21948	6				Labour	6.025	6.05	6
		Capital	6.12876	5.40143	6				Capital	6.39674	6.77174	6

## Sheet: Scenario analysis Okinawa
Nexus, Okinawa scenarios, See Fig. 4	Indicator	Unit	Okinawa current as benchmark	Weight	Okinawa, scenario I	Divergence from benchmark	Score, positioning benchmark at 6	Score combined (input to Fig. 3)	Okinawa, scenario II	Divergence from benchmark	Score	Score combined (Input to Fig. 3)
Water	Water consumption	Mill. m3	158	2	176	0.455696	6.4557	6.4557	188	0.759494	6.75949	6.75949
Water	Share of monitoring sites in agriculture above limit	%	N/A	3	N/A					N/A
Energy	Share of fossil energy in total energy supply	%	99.5	3	89.8	-0.584925	5.41508	5.41508	79.6	-1.2	4.8	4.8
Energy	Energy imports	%	99.5	2	89.8	-0.584925	5.41508		79.6	-1.2	4.8
Food	Net import of agricultural products, food and live animals	1000 I$ per person	0.09	2	0.08	-0.111111	5.88889	4.42864	0	-1	5	2.76522
Food	Change in cropland over the last 10 years	%	-4.92219	2	10	-3.03162	2.96838		22	-5.46956	0.530443
Labour	Total economic active population in agriculture/total economic active population	%	5	3	5	0	6	6.025	5	0	6	6.05
Labour	Average earning in agricultural production versus average earning in manufacturing	0	0.41	1	0.451	0.1	6.1		0.492	0.2	6.2
Capital	Total economic active population in agriculture versus net production value of agriculture	per 1000 I$	0.046	1	0.05	0.0869565	6.08696	6.39674	0.05	0.0869565	6.08696	6.77174
Capital	Investment share in GDP	%	30	3	35	0.5	6.5		40	1	7
Further data used and calculations, sources are given in Sections 2-3
Basic data	Baseline	Scenario I	Scenario II		Land-use change	Land for food in m2	Land for energy in m2	% of total area
Population	1393000	1432000	1432000					food	energy	food & energy
Area in km2	2271.3				Scenario 1	189320000	1.68487e+08	8.33531	8.33531	15.7534
Withdrawal of water in Mill m3/year	158				Scenario 2	209460000	492161912	9.22203	21.6687	30.8908
Total freshwater available in Mill m3/year	1549
Change in food produced in Okinawa	Production in t	Additional production in t	Additional production relative to baseline in %		Change in freshwater consumption	Additional water for food in Mill m3	Additional water for energy in Mill m3/year	Additional water due to population growth in Mill m3	Additional water due to growing tourism in Mill. m3	Additional total in Mill. m3	Total in Mill. m3	Freshwater consumption as share of water resources	Falkenmark Threshold: 1700 Mill. m3/cap
Baseline	1080077				Assumptions			1)	2)
Scenario 1	1.18809e+06	108008	10		Scenario 1	7.90002	0.409713	4.42355	5.4	18.1333	176.133	11.3708	1081.7
Scenario 2	1.31511e+06	235028	21.7603		Scenario 2	17.1907	1.44339	4.42355	5.4	28.4576	186.458	12.0373
						0.0921961	0.00774113	0.0237241	0.028961
					Assumptions:	1) scales with population
						2) 12 Mill tourists per year in 2025 according to OCVB. We assume average stay of 3 days. Number in 2010: 6 Mill visitors.
Energy infrastructure in Okinawa
Okinawa Energy Action Plan 2013	Data 2010	Data Scenario I	Data Scenario II
Electricity demand in MWh (excl. shift in transport sector)	8097469	8435722	8435722
RE demand in 2030		2036627	3839991
Efficiency target	% rel. to 2010	0.19	0.19
Capacities for electricity generation	Current	Scenario I	Scenario II	Current	Scenario I	Scenario II
Technologies	kW	kW	kW	MWh installed	MWh installed	MWh installed
Solar	81000	1300000	2040000	709560	11388000	17870400
Solar PV	81000	1300000	2040000	709560	11388000	17870400
CSP (insufficient information)				0	0	0
Wind	21500	229000	722000	188340	2006040	6324720
Onshore Wind	21500	129000	322000	188340	1130040	2820720
Offshore Wind	0	100000	400000	0	876000	3504000
Small/Medium Hydro	2250	9000	13000	19710	78840	113880
Biomass (incl. waste)	59833.3	96000	316000	524140	332880	1103760
Wood	9333.33	14000	47000	81760	122640	411720
Sugar Cane (Bagasse)	16000	24000	79000	140160	210240	692040
Waste & digestion gas	17250	29000	95000	151110	254040	832200
Waste	16000	24000	82000	140160	210240	718320
Digestion gas	1250	5000	13000	10950	43800	113880
Digestion gas, Okinawa case
Ocean Solutions	0	34300	308000	0	300468	2698080
Wave	0	17300	173000	0	151548	1515480
OTEC	0	10000	101000	0	87600	884760
Ocean Current	0	7000	34000	0	61320	297840
Sum RE	147333	1639300	3304000	1290640	14360268	28943040
* note that the total installed capacity roughly equal consumption assuming an average capacity factor of about 14%
Land for energy production	Land-use per technology (current state)					Land-use per technology (scenario I)				Land-use per technology (scenario II)
Technologies	Direct impact in m2/MWh	Landscape-level	Direct		Landscape	Direct			Landscape	Direct			Landscape
Source/Notes	* Land-use efficiencies from Trainor et al 2016		in m2	% of total (intensive sugarcane)		in m2	% of total area	% of baseline	in m2	in m2	% of total area	% of baseline
Solar PV	1.98		1.40493e+06	1.47204		22548240	13.3827	1604.94	15999329174400	35383392	7.18938	2518.52
CSP (insufficient information)	19.25	19.25
Onshore Wind	1.31	126.9	246725	0.258512	23900346	1.48035e+06	0.878613	600	278809571016	3.69514e+06	0.750798	1497.67	6.95943e+11
Offshore Wind
Small/Medium Hydro	16.86	16.86	332311	0.348185	332311	1.32924e+06	0.788927	400	26199367704	1.92002e+06	0.390119	577.778	37843531128
Wood	565	565	46194400	48.4011	46194400	69291600	41.1257	150	5665281216000	232621800	47.2653	503.571	19019158368000
Sugar Cane (Bagasse), one cropping	274	274	38403840	40.2384	38403840	57605760		150	8074023321600	189618960		493.75	26576993433600
Sugar Cane (Bagasse), intensive production (factor 1.5)	182.667	182.667	25602560	26.8256	25602560	38403840	22.7933	150	5382682214400	126412640	25.6852	493.75	17717995622400
Waste
Digestion gas	809	809	8858550	9.28173	8858550	35434200	21.0308	400	388004490000	92128920	18.7192	1040	0
Digestion gas, Okinawa case							0
Wave	0	0	0		0	0	0	0	0	0	0		0
OTEC	0	0	0		0	0	0	0	0	0	0		0
Ocean Current	0	0	0		0	0	0	0	0	0	0		0
Sum RE (sugar cane, one cropping) in m2			8.26395e+07										46329938603016
Sum RE (sugar cane, intensive production) in m2			9.54408e+07		1.17689e+08	1.68487e+08		176.536	27740306033520	492161912		515.673	37470940791816
Sum RE (sugar cane, one cropping) in km2			82.6395
Sum RE (sugar cane, intensive production) in km2			95.4408			168.487				492.162
Relative to Okinawa area in km2 in %, sugar cane one cropping			3.6389			0
Relative to Okinawa area in km2 in %, sugar cane intensive production			4.20259			7.41909				21.6716
Area Okinawa m2:
2271000000
Freshwater requirements for energy production	Water-use in qm/MWh/year	Water-use per technology (Baseline)	Water-use per technology (Scenario I)	Water-use per technology (Scenario II)
Technologies	Average	in Mill. m3/a
Renewable Technologies
Solar PV	0.1	0.070956	1.1388	1.78704
CSP	3.5
Onshore Wind
Offshore Wind
Small/Medium Hydro	* needs site-specific calculations
Wood	0.5	0.04088	0.06132	0.20586
Sugar Cane	0.5	0.07008	0.10512	0.34602
Waste
Digestion gas
Wave
OTEC
Ocean Current
Sum Renewable Technologies		0.181916	1.30524	2.33892
Fossil Technologies		3.75585	3.04224	3.04224
Total freshwater consumption in Mill. m3/a		3.93776	4.34748	5.38116
Fossil fuel power plants	Power plants	Region	Capacity in MW	Theoretical Max prod in GWh	Output in GWh	Output estimate in GWh (*)	Technology	Year	Cooling technology	Water consumption in m3/MWh	Water withdrawal m3/MWh	Water consumption in Mill m3	Water withdrawal in Mill m3
Steam			1629	14270		6421.52
Coal			752	6587.52	3275	3275
金武火力発電所＜1,2＞	Kin thermal power plant	Okinawa Honto	440	3854.4	1891	1891	steam turbine, coal	2002, 2003	Seawater	0.949458	300.841	1.79543	568.891
具志川火力発電所＜1,2＞	Gushikawa	Okinawa Honto	312	2733.12	1384	1384	steam turbine, coal, bitumous coal, biomass	1994, 1995	Seawater	0.949458	300.841	1.31405	416.364
LNG			502	4397.52		1978.88
吉の浦火力発電所＜1,2＞	Yoshinoura thermal power plant I-IV	Okinawa Honto	502	4397.52		1978.88	steam turbine, LNG	2012, 2013		1.10108	132.863	2.17892	262.92
Crude oil (Steam)			375	3285		1478.25
牧港火力発電所＜9＞	Makiminato thermal power plant Urasoe	Okinawa Honto	125	1095	789	789	steam turbine, heavy oil	1981		1.10108	132.863	0.868755	104.829
石川火力発電所＜1,2＞	Ishikawa thermal power plant (oil)	Okinawa Honto	250	2190	409	409	steam turbine, heavy oil	1974, 1978		1.10108	132.863	0.450343	54.3409
Crude oil (diesel)			197.57	1730.71		778.821
久米島発電所	Kume Diesel	Kume	18.5	162.06		72.927	diesel, heavy fuel oil
粟国発電所	Aguni Diesel	Aguni	1.3	11.388		5.1246	diesel, heavy fuel oil
渡嘉敷発電所	Tokashiki Diesel	Tokashiki	4.9	42.924		19.3158	diesel, heavy fuel oil
渡名喜発電所	Tonaki Diesel	Tonaki	0.85	7.446		3.3507	diesel, heavy fuel oil
新多良間発電所	Shin-Tarama Diesel	Shin-Tarama	1.78	15.5928		7.01676	diesel, heavy fuel oil
与那国発電所	Yonaguni Diesel	Yonaguni	3.41	29.8716		13.4422	diesel, heavy fuel oil
波照間発電所	Hateruma Diesel	Hateruma	1.25	10.95		4.9275	diesel, heavy fuel oil
石垣発電所	Ishigaki Diesel	Ishigaki	20	175.2		78.84	diesel, heavy fuel oil
石垣第二発電所	Ishigaki No. 2	Ishigaki	76	665.76		299.592	diesel, heavy fuel oil
北大東発電所	Kitadaito Diesel	Kitadaito	1.54	13.4904		6.07068	diesel, heavy fuel oil
南大東発電所＜1,4 ＞	Miniamidaito Diesel	Minamidaito	3.04	26.6304		11.9837	diesel, heavy fuel oil
宮古発電所	Miyako Diesel No. 1	Miyako	10	87.6		39.42	diesel, heavy fuel oil
宮古第二発電所	Miyako Diesel No. 2	Miyako	55	481.8		216.81	diesel, heavy fuel oil
Gas turbines			326	2855.76		1285.09
石垣GT発電所＜1,2＞	Ishigaki Gas Turbine	Ishigaki	10	87.6	42	42	gas turbine, heavy fuel oil			0.191336	0.191336	0.0080361	0.0080361
牧港GT発電所＜1,2＞	Makiminato thermal power plant Urasoe	Okinawa Honto	163	1427.88		642.546	gas turbine, kerosine	1977, 1990		0.191336	0.191336	0.122942	0.122942
石川GT発電所	Ishikawa kerosine power plant	Okinawa Honto	103	902.28		406.026	gas turbine, kerosine	1992		0.191336	0.191336	0.0776873	0.0776873
	Yoshinoura thermal power plant I-IV	Okinawa Honto	35	306.6		137.97	gas turbine, LNG, bioethanol	2012, 2013		0.191336	0.191336	0.0263986	0.0263986
宮古GT発電所＜2,3＞	Miyako Gas Turbine	Miyako	15	131.4	119	119	gas turbine, heavy fuel oil			0.191336	0.191336	0.022769	0.022769
Totals			2152.57	18856.5	8796.05	this matches today's demand of about 8.1 TWh				Total:		3.75585	422.348
Water footprints (**)	Consumption	Withdrawal	Water footprints (**)	Consumption	Withdrawal			Compare with water available
Steam, Coal	0.263	83.333	Gas turbines, liquids	0.053	0.053		MW in MWh factor	1
Steam, LNG	0.305	36.803	Diesel generator	n/a	n/a		m3/GJ in m3/MWh factor	3.61011
Steam, heavy oil	0.305	36.803
Note:	* Efficiency of fossil technologies range between 0.3-0.6. We take 0.5 and a capacity factor of 0.85 to match today's demand of about 8.1 TWh/a
	** Waterfootprint factor (Behrens et al. 2017)
Okinawa population and import data, projections
	Actual	Actual	Actual	Actual	Actual	Projected	Projected	Projected
Year	1995-01-10	2000-01-10	2005-01-10	2010-01-10	2015-01-10	2020	2025	2030
Population	1273440	1318220	1361594	1392818	1433566	1.47666e+06	1.52106e+06	1.56679e+06
Source of actual data		https://www.citypopulation.de/php/japan-admin.php?adm1id=47
Year	(1995-2000)	(2000-20005)	(2005-2010)	(2010-2015)	(2015-2020)	(2020-2025)	(2025-2030)
rate of population change	0.0351646	0.0329035	0.0229319	0.0292558	0.0300639	0.0300639	0.0300639
	Population	Employment in agriculture	Total economic active population
2010	1392818	37000	617000		0.0599676
2030	1566843	41622.9	694091		0.0599676
Import/Export data
calculations based on import and export pdf reports (for heisei 22)			scenario 1
import value	16349347000	yen	13119729000
export value	2919774000	yen
net imports	13429573000	yen
net imports	1.20297e+08	I $	1.17521e+08	assume exchange rate of 1 I$ for 111.637 yen (ppp for 2010)
net imports	120297	1000 I $	117521
okinawa population	1392818	heisei 22	1432436
net imports per capita	0.0863694	1000 I $	0.082043
Okinawa food scenario calculations
	Heisei 22
Food Categories	production (tons)	exported (outside Japan)	shipped (to mainland)	imported (from outside Japan)	value of imports (1000 yen)	purchased (from mainland)	net consumed	land used for production (ha)	land used for production (2000)	water use (liters/kg)	water requirement (calories per cubic meter)
Fruits and Vegetables	73485	14.803		30367	3151169		103837	1369	3270	100-500	1000-7000
Rice	2680	6		25525	1309580		28199	914	1040		500-2000
Meat	36203	18		14912	5455047		51097	6030		1400-23000	60-210
Fish and Acquaculture	33945	3770		4660	1188347		34835	NA
Stimulants (e.g. Tobacco)	2249	0		0			2249	1141	1353
Sugarcane	879657	20		1494	125587		881131	12747	14598
Flowers	NA	0		NA			NA	981	1170
Cofee/Tea	335	4		916	460534		1247	41	41
Dairy and eggs	51508	504		832	255684		51836
Grains (e.g. wheat)	15			96085	2629148		96100	10	12
Feed for animals				28201	1235153		28201
other								4137
Total	1080077			202992			1278732	17203	21484
Total (value in JPY)	69311000000				15810249		1283069
Scenario 2		Scenario 1 (increase land use by 10% and import the rest)
expected agriculture production in 2030	land use (ha)	amount needed	amount produced in Okinawa	amount imported	value of imports (1000 yen)	land use (ha)
106791		106791	80833.8	25957.2	2.69356e+06
29001.1		29001.1	2948	26053.1	1.33667e+06
52550.4		52550.4	39823.3	12727.1	4.65579e+06
35825.9		35825.9	37339.5	0	0
2312.97		2312.97	2473.9	0	0
906194		906194	967623	0	0
NA		NA	NA	NA	0
1282.47		1282.47	368.5	913.97	459514
53310.4		53310.4	56658.8	0	0
98833.5		98833.5	16.5	98817	2.7039e+06
29003.2		29003.2	0	29003.2	1.27029e+06
1.31511e+06	20946.4		1.18809e+06		1.31197e+07	18923.3
1.2176			1.1
Land-use
Okinawa	Source: https://www.e-stat.go.jp/SG1/chiiki/TableDownloadDispatchAction.do
		Okinawa-ken	Sum	Change: 10 years
Item	Year
Evaluated land tract [paddy fields]（m2）	2000	17418906	500430197	-0.0399079
Evaluated land tract [paddy fields]（m2）	2001	16872838	499450486	-0.0426904
Evaluated land tract [paddy fields]（m2）	2002	16760884	497601105	-0.0476341
Evaluated land tract [paddy fields]（m2）	2003	16669767	495103124	-0.0472419
Evaluated land tract [paddy fields]（m2）	2004	16611298	493234930	-0.0492219
Evaluated land tract [paddy fields]（m2）	2005	16445831	491340283
Evaluated land tract [paddy fields]（m2）	2006	16306160	490281759
Evaluated land tract [paddy fields]（m2）	2007	16245033	487940467
Evaluated land tract [paddy fields]（m2）	2008	15603709	484235539
Evaluated land tract [paddy fields]（m2）	2009	15517915	482294699
Evaluated land tract [paddy fields]（m2）	2010	15208328	480459054
Evaluated land tract [paddy fields]（m2）	2011	14379793	478128734
Evaluated land tract [paddy fields]（m2）	2012	13562071	473898317
Evaluated land tract [paddy fields]（m2）	2013	13055044	471713523
Evaluated land tract [paddy fields]（m2）	2014	12993658	468956977
Evaluated land tract [fields]（m2）	2000	483011291
Evaluated land tract [fields]（m2）	2001	482577648
Evaluated land tract [fields]（m2）	2002	480840221
Evaluated land tract [fields]（m2）	2003	478433357
Evaluated land tract [fields]（m2）	2004	476623632
Evaluated land tract [fields]（m2）	2005	474894452
Evaluated land tract [fields]（m2）	2006	473975599
Evaluated land tract [fields]（m2）	2007	471695434
Evaluated land tract [fields]（m2）	2008	468631830
Evaluated land tract [fields]（m2）	2009	466776784
Evaluated land tract [fields]（m2）	2010	465250726
Evaluated land tract [fields]（m2）	2011	463748941
Evaluated land tract [fields]（m2）	2012	460336246
Evaluated land tract [fields]（m2）	2013	458658479
Evaluated land tract [fields]（m2）	2014	455963319
Evaluated land tract [land of building]（m2）	2000	126594179
Evaluated land tract [land of building]（m2）	2001	127656401
Evaluated land tract [land of building]（m2）	2002	128717488
Evaluated land tract [land of building]（m2）	2003	129632402
Evaluated land tract [land of building]（m2）	2004	130335793
Evaluated land tract [land of building]（m2）	2005	131362651
Evaluated land tract [land of building]（m2）	2006	132671718
Evaluated land tract [land of building]（m2）	2007	133774154
Evaluated land tract [land of building]（m2）	2008	134378597
Evaluated land tract [land of building]（m2）	2009	135449789
Evaluated land tract [land of building]（m2）	2010	136550216		0.0601199
Evaluated land tract [land of building]（m2）	2011	137392524
Evaluated land tract [land of building]（m2）	2012	138488983
Evaluated land tract [land of building]（m2）	2013	139614559
Evaluated land tract [land of building]（m2）	2014	140691936

## Sheet: Scenario analysis Sogn og Fjord
Wind potential & conflicts		Source:	http://www.sfj.no/getfile.php/3394474.2344.qeycfvxyyc/Regional+plan+for+vindkraft_08.06.2011+pdf+web+hefte.pdf
	Area in km2	Landscape	Cultural heritage	INON	Friluftsliv	Biodiversity	Agricultural	Sum of criteria	Notes:
Study sites	Evaluation criteria	see notes						no weighing		Landscape	overlapping with national (5)/regional (3) important landscapes/cultural landscape sites
	ESS effected	Cultural (spiritual, heritage, identity) ESS		Supporting (resilience) ESS	Cultural (recreational) ESS	Supporting (biodiversity) ESS	Provisioning			Cultural heritage	(5) if partly or fully listed as cultural important property (special heritage list) and (3) if identified nationally or regionally important today or potentially
Atløy	21.76	1	3	5	1	5	3	18		INON	Natural areas without technical interference in a distance of at least 1 km (INON). The highest of 3 INON categories applies if it is more than 3 km. Strong conflict potential is given if the area is of national priority or if 25% of the study area is categorized as INON. An increase by one value is automatically done if an area greater 0.5 km2 has been identified as the highest INON category.
Austefjellet	21.34	1	1	5	3	3	1	14		Friluftsliv	5 (3) in case the area conflicts with national (regional) targets.
Bergsheia	11.45	3	5	3	1	3	1	16		Biodiversity	overlapping with national (5) or reginal (3) important biodiversity area. If nesting area of redlisted birds is effected than this is also considered and can increase conflict level.
Blåfjellet	16.69	1	3	5	1	5	3	18		Agriculture	5 if they overlap with important agricultural areas and 3 if they border these.
Bleikebrekkfjellet	21.79	1	1	3	1	3	1	10		Tourism	by default in conflict with wind potential development
Bråstadheia	25.42	3	1	3	1	3	1	12
Brosviksåta	11.57	1	1	1	3	1	1	8
Bukkefjellet (Såta)	23.16	5	1	5	3	5	1	20
Bukkenibba	60.21	3	1	1	5	3	1	14		Summary: Wind potential & conflicts
Bygdeheia Ø	12.64	3	3	3	1	3	1	14
Bygdeheia V	11.43	3	3	1	1	5	1	14		Categories	Share of area listed as 5 in total area in %	Share of area listed as 3 or higher in total area in %	ESS	Share of area listed as 5 in total area in %	Share of area listed as 3 or 5 in total area in %
Dalsfjellet	36.39	3	3	3	1	3	1	14		Cultural Heritage	14.9	36.3	Cultural (spiritual, cultural)	18.1	67.4
Dombesteinseggene	35.05	1	1	3	1	5	1	12		Landscape	9.5	58.4
Drivarfjellet	25.45	1	1	3	1	5	1	12		Friluftsliv	10.7	40.6	Cultural (recreational)	10.7	40.6
Durnappen	23.87	1	1	3	1	5	3	14		Agriculture	1.9	12.8	Provisioning (reared animals, crops)	1.9	12.8
Dyrelifjellet	17.6	3	1	3	3	3	1	14		Biodiversity	42.8	84.7	Supporting (biodiversity)	42.8	84.7
Eitrenipa	19.56	3	1	3	3	5	1	16		INON (%)	40.96	79	Supporting (resilience)	40.96	79
Eltvikhornet	19	5	5	5	1	5	3	24		INON (area in skm)	815.13	1572.05
Flatefjellet	22.25	1	1	1	1	1	1	6
Fonnaheia	26.13	3	3	5	1	5	3	20
Frøya	11.86	3	5	5	1	5	3	22
Gjelsvikefjellet	15.89	3	1	1	3	3	1	12
Grønehaugen	12.29	3	1	1	3	1	1	10
Håfjellet	13.06	3	3	5	3	5	3	22
Hamnafjellet	11.78	3	3	5	1	5	1	18
Håsteinen	13.52	1	1	5	1	5	1	14
Haukåbøra	12.52	3	1	3	3	1	1	12
Haukånipa	14.97	3	1	3	3	3	1	14
Heida	13.56	1	1	1	5	3	1	12
Hekkelfjellet	17.5	3	1	3	1	5	1	14
Hiserøyna	20.24	1	3	3	3	3	1	14
Høgeheia	9.72	3	5	5	3	5	1	22
Høgenova	11.02	1	1	5	1	1	1	10
Horsnappen	11.55	3	3	5	1	5	3	20
Hovden	10.87	3	5	5	1	5	1	20
Husfjellet	14.16	1	1	1	1	3	1	8
Indrevågefjellet	14.38	3	1	3	3	3	1	14
Kantilheia	30.96	1	1	3	3	3	1	12
Kvamefjellet	24.67	5	5	5	1	5	1	22
Kvitebergnova	15.18	1	1	5	3	3	1	14
Langedalen	23.05	5	5	5	5	5	5	30
Langeheia	16.71	1	1	5	3	1	1	12
Langevasshorn	23.31	3	3	5	1	5	3	20
Lifjell	17.08	3	5	5	3	5	1	22
Lindefjellet	11.33	3	3	5	1	5	1	18
Lutelandet	9.62	3	3	5	3	5	1	20
Marafjellet	33.45	1	3	5	1	3	1	14
Mehuken	9.67	5	1	1	1	5	1	14
Meifjellet	17.89	3	3	5	1	5	1	18
Midtbøfjellet	19.44	1	1	1	1	5	3	12
Mjømnefjellet	13.12	1	1	5	1	3	1	12
Moldurda	17.42	3	1	3	1	3	1	12
Mulliegga	15.52	3	1	3	3	1	1	12
Nausane Ø	12.56	5	5	3	1	3	1	18
Nausane V	11.67	5	5	5	1	1	3	20
Nesfjellet	19.62	1	1	3	1	3	1	10
Nibba	26.69	3	1	1	5	3	1	14
Ormekletten	11.57	1	3	5	3	3	1	16
Orretuva	22.47	3	1	3	1	1	1	10
Portafjellet	35.44	3	1	3	3	5	1	16
Ramsgrøheia	18.81	3	5	1	1	3	1	14
Ramsskredfjellet	22.52	3	1	1	3	1	1	10
Rauddalskammen Ø	24.37	1	1	3	1	5	1	12
Rauddalskammen V	20.53	1	1	3	1	5	1	12
Rikeloftet N	14.77	3	1	3	1	3	1	12
Rikeloftet S	13.75	3	1	3	1	1	1	10
Riseheiane	15.82	3	1	1	3	3	1	12
Røyseheida	14.71	1	1	3	1	3	1	10
Såta	21.3	3	1	1	5	3	1	14
Seljevollfjellet	14.94	1	1	3	1	3	1	10
Setenesfjellet	14.86	1	3	5	1	5	1	16
Skålefjell	14.82	1	3	1	1	5	1	12
Skateheia	15.42	3	3	3	1	5	1	16
Skoraheia	21.05	1	1	5	1	3	1	12
Skorfjellet	14.15	5	5	5	1	5	5	26
Skudalsnipa	21.57	3	5	3	3	3	1	18
Slettevarden	15.65	3	1	5	3	3	1	16
Slettheia	14.94	1	1	1	1	3	1	8
Smilleheia	15.16	3	5	5	1	3	1	18
Snønyken	48.24	3	1	1	5	1	1	12
Sperrefjellet	11.9	3	3	5	1	5	1	18
St Synnevahornet	29.64	5	1	3	1	5	1	16
Steinheia	23.74	3	1	5	1	5	1	16
Steinheia	10.86	1	3	3	1	5	1	14
Steinknallane	31.69	5	1	5	1	1	1	14
Steinsetfjellet	13.35	1	1	5	3	3	1	14
Stølsfjellet	15.06	1	1	1	1	3	1	8
Stølsnipa	21.14	1	1	3	1	1	1	8
Storehorn	16.21	3	1	5	1	5	1	16
Storenova	30.7	1	1	3	3	5	1	14
Storsteinlifjellet	30.63	1	1	3	1	3	1	10
Storurdfjellet	17.08	1	1	5	3	1	1	12
Styggeheia	29.32	1	1	5	3	3	1	14
Sundsheia	14.5	1	1	3	3	3	1	12
Svartevassegga	20.51	3	5	5	5	5	1	24
Taket	18.6	1	1	5	3	3	1	14
Toreheia	19.78	1	3	5	1	5	3	18
Tverrdalsnipa	22.18	3	5	3	3	5	1	20
Ulvegreina	14	3	3	5	1	5	1	18
Urdanipa	16.37	3	3	5	1	5	1	18
Vardane	23.61	1	1	3	1	3	1	10
Vardefjellet	14.19	3	3	5	3	5	1	20
Vetefjellet	10.93	3	3	5	1	5	1	18
Vingeegga	12.32	3	5	5	1	5	1	20
Vingekvarven	14.16	1	3	5	1	3	1	14
Total	1989.94	is about 7% of SF total area		39798.8
Hydropower potential & conflicts			http://www.sfj.no/getfile.php/3394593.2344.fxxdyprupd/Vedteken11.12.2012+Regional+plan+med+tema+knytt+til+vasskraftutbygging.pdf
Number of potential small hydropower plant projects in SF (ppt & intake within fylke)			737	Source:	https://docs.google.com/spreadsheets/d/13deMQPL90k3Nr70dLxUdAZKxVzsa6bkGuXYWfdS6t4s/edit#gid=575001957
	Total number of intakes and waterfalls	Landscape incl. Fjordlandscape & waterfalls		Cultural heritage		INON		Friluftsliv & Reiseliv		Biological diversity		Agriculture=Fish & Fishery
Study sites	Evaluation criteria	see notes
	ESS effected	Cutlural (spiritual, heritage, identity) ESS				Supporting (resilience) ESS		Cultural (recreational) ESS		Supporting (biodiversity) ESS		Provisioning
		Intakes	PPT	Intakes	PPT	Intakes	PPT	Intakes	PPT	Intakes	PPT	Intakes	PPT
All county statistics		13 intakes, 26 ppt in regional important cultural landscapes		2 intakes, 1 ppt within Unesco Cultural Heritage Nærøyfjord; the coast line is generally of regional and local cultural importance as earliest settlements started there		Total INON: 235 intakes, 101 ppt	INON only (middle, high): 19 intakes, 12 ppt	178 intakes, 128 ppt; 14 intakes and 19 ppt on trails (not counting overlapp with both)		Overlapp with important natural sites & species: 20 intakes, 48 ppt		49 ppt on shore of national important area for salmon (fjords)
Relative to total number of potential ppt (roughly also equals number of intakes) in %		1.76391	3.52782	0.27137	0.135685	31.886	13.7042	26.0516	19.9457	2.7137	6.51289	6.64858
Uncertainty (if applicable)						2.57802	1.62822
Sum		5.29172		0.407056		4.2-45.6		45.9973		9.22659		6.64858
Notes:
	Landscape	overlapping with national (5)/regional (3) important landscapes/cultural landscape sites
	Cultural heritage	(5) if partly or fully listed as cultural important property (special heritage list) and (3) if identified nationally or regionally important today or potentially
	INON	Natural areas without technical interference in a distance of at least 1 km (INON). The highest of 3 INON categories applies if it is more than 3 km. Strong conflict potential is given if the area is of national priority or if 25% of the study area is categorized as INON. An increase by one value is automatically done if an area greater 0.5 km2 has been identified as the highest INON category.
	Friluftsliv & Reiseliv	5 (3) in case the area conflicts with national (regional) targets.
	Biodiversity	overlapping with national (5) or reginal (3) important biodiversity area. If nesting area of redlisted birds is effected than this is also considered and can increase conflict level.
	Fish & Fishery	Overlap with national important waters for salmon production
	Tourism	by default in conflict with wind potential development
